# Supplementary material
Source: publisher figshare collection journal article supplement (https://frontiersin.figshare.com/ndownloader/files/25288592)
Supplement: Supplementary file [file 25288592]

**Supplementary Table S4: Statistical analyses of the influence of different NaCl concentrations on the number of seeds per silique in Col-0 and transgenic plants carrying the *p<sub>17340</sub>:P5CS2* construct (Figure 1C)**

| Source of variation <sup>a</sup>       | DF <sup>b</sup>                                     | AIC <sup>c</sup> | LRT <sup>d</sup> | p-value |
|----------------------------------------|-----------------------------------------------------|------------------|------------------|---------|
| Treatment                              | 2                                                   | 2478             | 51.0             | <0.001  |
| Genotype                               | 1                                                   | 2471             | 42.1             | <0.001  |
| Treatment x genotype                   | 2                                                   | 2430             | 0.902            | 0.63    |
| Pairwise comparisons <sup>e</sup>      |                                                     |                  |                  |         |
| Fixed factor                           | comparison                                          |                  | z-value          | p-value |
| 0 mM NaCl                              | Col-0 vs.<br>Col-0 + <i>p<sub>17340</sub>:P5CS2</i> |                  | 3.69             | <0.01   |
| 100 mM NaCl                            |                                                     |                  | 3.46             | <0.01   |
| 150 mM NaCl                            |                                                     |                  | 4.16             | <0.001  |
| Col-0                                  | 0 vs. 100 mM NaCl                                   |                  | -3.98            | <0.001  |
|                                        | 0 vs. 150 mM NaCl                                   |                  | -4.82            | <0.001  |
|                                        | 100 vs. 150 mM NaCl                                 |                  | -1.38            | 0.67    |
| Col-0 + <i>p<sub>17340</sub>:P5CS2</i> | 0 vs. 100 mM NaCl                                   |                  | -4.35            | <0.001  |
|                                        | 0 vs. 150 mM NaCl                                   |                  | -4.42            | <0.001  |
|                                        | 100 vs. 150 mM NaCl                                 |                  | -0.17            | 1.00    |

<sup>a</sup> A generalized linear model (R-package “*lme4*”; Bates, D., Mächler, M., Bolker, B., and Walker, S. (2015). Fitting Linear Mixed-Effects Models Using *lme4*. *J. Stat. Softw.* 1(1). doi: 10.18637/jss.v067.i01) assuming Poisson-distribution was used to compare different genotypes among each other as well as their response to the different treatments. Significance of the influence of treatment, genotype and their interaction was determined by excluding these factors successively from the model.

<sup>b</sup> Degrees of freedom

<sup>c</sup> Akaike information criterion

<sup>d</sup> Likelihood ratio test

<sup>e</sup> with the *glht* function of the R-package “*multcomp*” (Hothorn, T., Bretz, F., and Westfall, P. (2008). Simultaneous inference in general parametric models. *Biom. J.* 50(3), 346-363. doi: 10.1002/bimj.200810425)
